# Supplementary material for: CRISPR-Cas9 Toolkit for Genome Editing in an Autotrophic CO2-Fixing Methanogenic Archaeon
Source: PubMed Central journal article supplement (PMC9430280; doi:10.1128/spectrum.01165-22), 2022-06-29
Supplement: spectrum.01165-22-s0001.pdf [file spectrum.01165-22-s0001.pdf]

1 **Supplementary Information for**

2

3 **CRISPR-Cas9 toolkit for genome editing in an autotrophic CO<sub>2</sub> fixing**  
4 **methanogenic archaeon**

5

6

7

8

9

10

11

12 **This file contains:**

13 **Supplementary Figures S1-S5.**

14 **Supplementary Tables S1-S5.**

15 **Supplementary Figures**

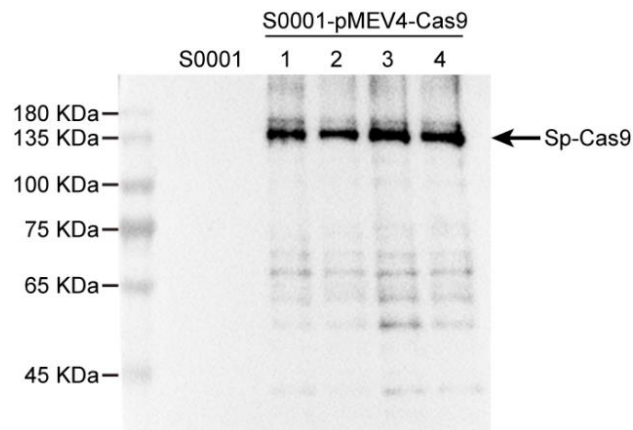

16

17 **Figure S1. The Cas9 expression in *M. maripaludis*.** The optimized SpCas9 was  
18 constructed in pMEV4 plasmid and transferred into *M. maripaludis* strain S0001 and  
19 its expression was verified by western blot using the commercial antibody of SpCas9.  
20 Arrow indicated the protein band of the soluble SpCas9. Lanes 1 to 4 display protein  
21 samples from four selected transformants after puromycin selection.

22

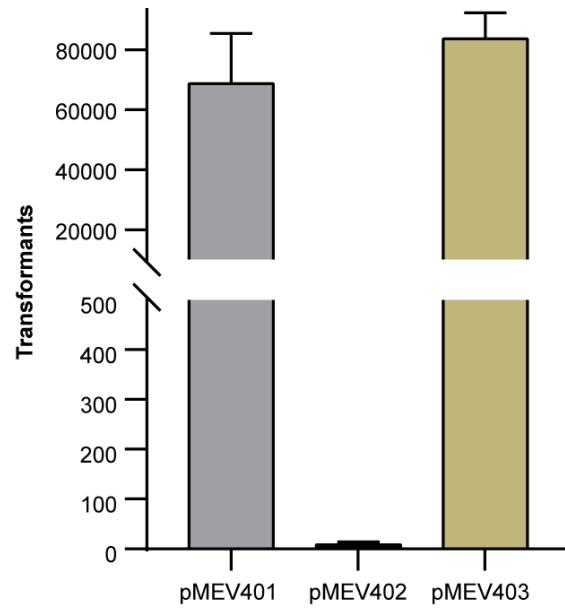

24

25 Figure S2. The numbers of puromycin resistant transformants obtained by separately

26 transferring 1  $\mu$ g plasmid DNA of pMEV401, 402, and 403 into *M. maripaludis*.

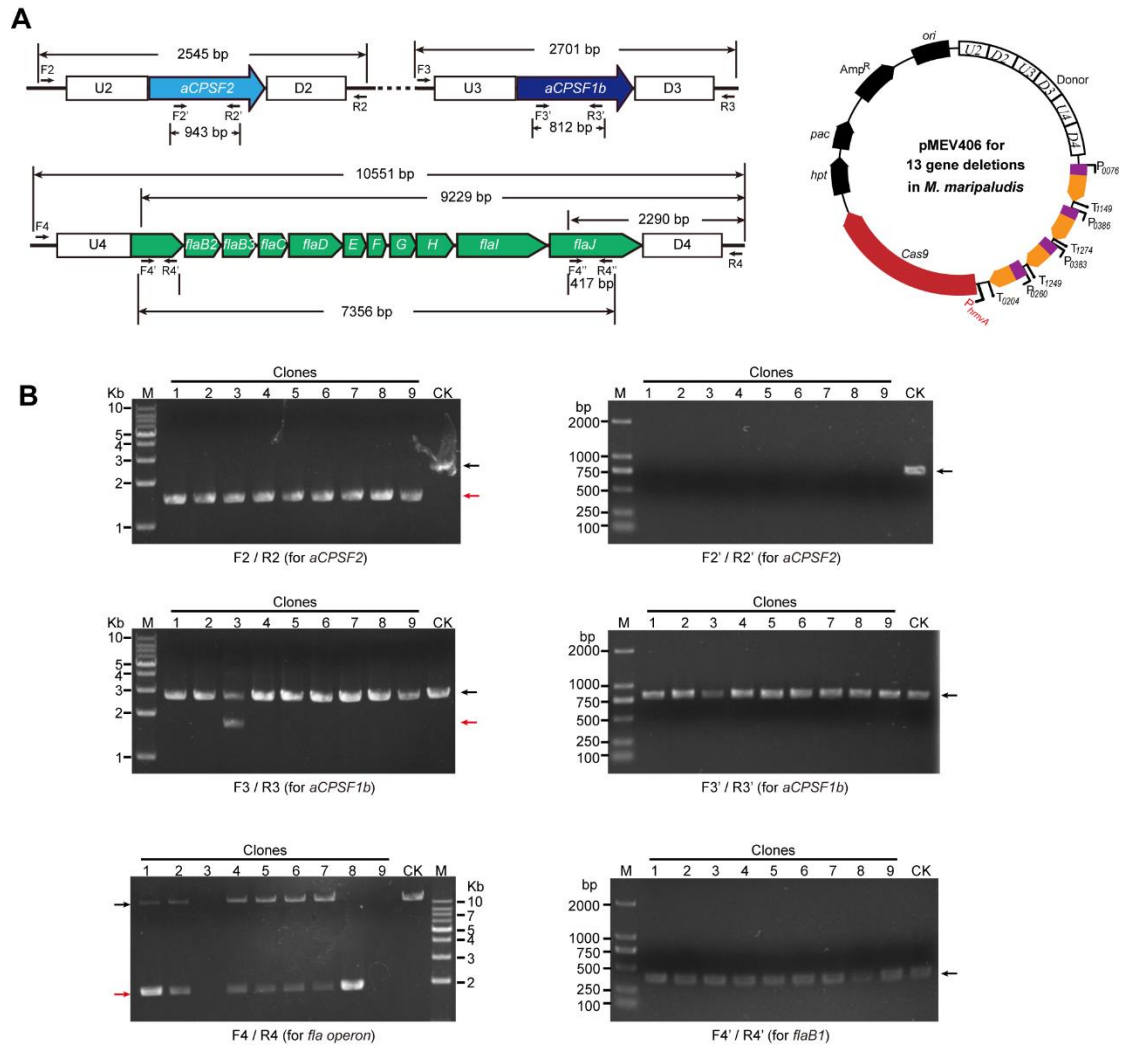

27

28 **Figure S3. Synchronous deletion of multiple (13) genes located at three different**  
 29 **genomic loci using the Cas9-editing system explored in *M. maripaludis* by one-step**  
 30 **transformation.** (A) The design of simultaneous deletion of the multiple genes  
 31 including two  $\beta$ -CASP ribonucleases encoding genes, *aCPSF2* (*MMP0431*) and  
 32 *aCPSF1b* (*MMP1381*), and the whole *fla* operon genes of *MMP1666* to *MMP1676*.  
 33 The pMEV406 plasmid encodes four sgRNAs that respectively match *aCPSF2*  
 34 (*MMP0431*), *aCPSF1b* (*MMP1381*), *flaB1* (*MMP1666*) and *flaJ* (*MMP1676*), which  
 35 were expressed by indicated promoters derived from highly expressed genes in *M.*  
 36 *maripaludis*. The sequences upstream (U2, U3, and U4) and downstream (D2, D3, and

37 D4) of each target gene were concatenated on pMEV406 to provide the recombinant  
38 donor. Distinctly, the Cas9 expressed in pMEV406 plasmid was derived by a promoter  
39 of *PhmvA*, a constitute promoter commonly used in *M. maripaludis*. (B) Ten puromycin  
40 resistance transformants were randomly selected for PCR analysis with primers F2/ R2,  
41 F2'/R2', F3/R3 F3'/R3', F4/R4, and F4'/R4' to detect the knock out of the *aCPSF2* and  
42 *aCPSF1b* genes, and the *fla* operon genes, respectively. Black and red arrows indicate  
43 the PCR products amplified from the wild-type (CK) and the mutated genomes,  
44 respectively. M, dsDNA size marker.

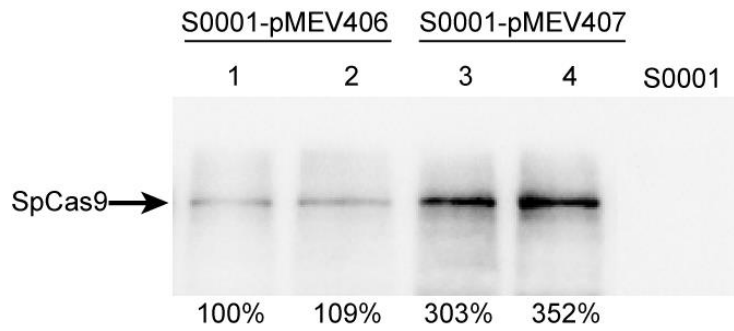

45

46 Figure S4. Comparison of SpCas9 expression in pMEV406 and pMEV407. Using the

47 commercial antibody of SpCas9, Western blot assayed improved expression of SpCas9

48 under a stronger promoter P0386 in pMEV407 compared with that under PhmvA in

49 pMEV406. Arrow indicates the soluble SpCas9 protein. By reference to the band

50 intensity (100%) of SpCas9 expressed in pMEV401, the protein percentages expressed

51 in strain S0001 carrying pMEV406 and pMEV407 were calculated.

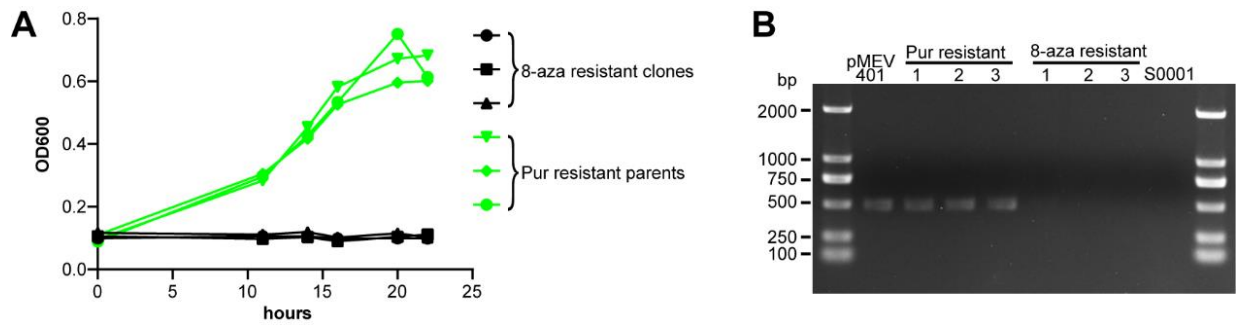

52

53 Figure S5. Curing of the Cas9-based pMEV4 plasmid using the *hpt* counterselection

54 marker. (A) Growth curves of three puromycin-resistant (Pur<sup>R</sup>) transformants and three

55 8-aza resistant transformants derived from the Pur<sup>R</sup> parent after curing the plasmid were

56 compared in liquid medium with 2.5 μg/ml puromycin. (B) Primers to amplify the *hpt*

57 gene in the pMEV4 plasmid were used to screen for the completeness of the curing for

58 the Cas9-based pMEV4 plasmid in each of the three Pur<sup>R</sup> parents (lanes Pur resistant)

59 and 8-azahypoxanthine resistant transformants (lanes 8-aza resistant). Plasmid pMEV4

60 and the parental strain S0001 were used as positive and negative controls, respectively

61 (lanes pMEV401 and S0001).

62 **Supplementary Tables**63 **Table S1. Strains and plasmids used in this study**

| Strains and plasmids                                                | Characteristics and descriptions                                                                                                                                                               | Reference or sources |
|---------------------------------------------------------------------|------------------------------------------------------------------------------------------------------------------------------------------------------------------------------------------------|----------------------|
| <b>Strains</b>                                                      |                                                                                                                                                                                                |                      |
| <i>E. coli</i> DH5 $\alpha$                                         | F $\phi$ 80d <i>lacZ</i> $\Delta$ M15 $\Delta$ ( <i>lacZYA-arg F</i> ) U169 <i>endA1 recA1</i><br><i>hsdR17</i> ( $r_k^-, m_k^+$ ) <i>supE44</i> $\lambda$ - <i>thi -1 gyrA96 relA1 phoA</i>   | TransGen , Beijing   |
| <i>M. maripaludis</i> S0001                                         | S2 $\Delta$ hpt + ORF1 of pAW42                                                                                                                                                                | (1)                  |
| <i>Mmp-<math>\Delta</math>MMP1197</i>                               | S0001 with <i>Mmp1197</i> deletion                                                                                                                                                             | This study           |
| <i>Mmp-<math>\Delta</math>aCPSF1b/aCPSF2</i>                        | S0001 with <i>aCPSF1b</i> and <i>aCPSF2</i> deletion                                                                                                                                           | This study           |
| <i>Mmp-<math>\Delta</math>fla</i>                                   | S0001 with <i>fla</i> operon deletion                                                                                                                                                          | This study           |
| <i>Mmp-<math>\Delta</math>aCPSF1b/aCPSF2/<math>\Delta</math>fla</i> | S0001 with <i>aCPSF1b</i> , <i>aCPSF2</i> and <i>fla</i> operon deletion                                                                                                                       | This study           |
| <i>Mmp-mCherry</i>                                                  | S0001 with mCherry inserted into the intergenic region of<br><i>MMP0852/MMP0853</i> ( <i>MMP0852</i> :: <i>Pmcr-sat-Tmcr</i> ;<br><i>MMP0853</i> :: <i>P0386-mCherry-T<sub>mmp1149</sub></i> ) | This study           |
| <i>Mmp-aCPSF1-H2F</i>                                               | S0001 with <i>MMP0694</i> 3'-end His <sub>6</sub> and 3Flag tags                                                                                                                               | This study           |
| <i>Mmp-muaCPSF1-H2F</i>                                             | S0001 with <i>MMP0694</i> 3'-end His <sub>6</sub> and 3Flag tags                                                                                                                               | This study           |
| <i>Mmp- RpoL-H2F</i>                                                | S0001 with <i>MMP0261</i> 3'-end His <sub>6</sub> and 3Flag tags                                                                                                                               | This study           |
| <i>Mmp- P0386(-3)-mCherry</i>                                       | <i>Mmp-mCherry</i> with -2 point mutagenesis of <i>P0386</i>                                                                                                                                   | This study           |
| <i>Mmp- P0386(-2)-mCherry</i>                                       | <i>Mmp-mCherry</i> with -2 point mutagenesis of <i>P0386</i>                                                                                                                                   | This study           |
| <i>Mmp- P0386(-2, -3)-mCherry</i>                                   | <i>Mmp-mCherry</i> with -2 and -3 point mutagenesis of <i>P0386</i>                                                                                                                            | This study           |
| <i>Mmp- P0386(1)-mCherry</i>                                        | <i>Mmp-mCherry</i> with 1 point mutagenesis of <i>P0386</i>                                                                                                                                    | This study           |
| <i>Mmp- P0386(3)-mCherry</i>                                        | <i>Mmp-mCherry</i> with 3 point mutagenesis of <i>P0386</i>                                                                                                                                    | This study           |
| <i>Mmp- sg5(-2m)-mCherry</i>                                        | <i>Mmp-mCherry</i> with -2 point mutagenesis of <i>sg5</i>                                                                                                                                     | This study           |
| <i>Mmp- sg8(1m)-mCherry</i>                                         | <i>Mmp-mCherry</i> with 1 point mutagenesis of <i>sg8</i>                                                                                                                                      | This study           |
| <i>Mmp-T0290-mutant</i>                                             | S0001 with multiple mutagenesis of terminator of <i>MMP0290</i><br>(T1149)                                                                                                                     | This study           |
| <b>Plasmids</b>                                                     |                                                                                                                                                                                                |                      |
| pMD19-T                                                             | Amp <sup>R</sup>                                                                                                                                                                               | Takara , Japan       |
| pMD19-T-ORF-1197                                                    | pMD19-T with <i>Mmp-1197</i> donor and its open reading frame<br>(ORF)                                                                                                                         | This study           |
| pMD19-T-Donor-1197                                                  | pMD19-T with <i>Mmp-1197</i> donor                                                                                                                                                             | This study           |
| pMD19-T-ORF-aCPSF1b                                                 | pMD19-T with <i>aCPSF1b</i> donor and its open reading frame<br>(ORF)                                                                                                                          | This study           |
| pMD19-T-Donor-aCPSF1b                                               | pMD19-T with <i>aCPSF1b</i> donor                                                                                                                                                              | This study           |
| pMD19-T-ORF-aCPSF2                                                  | pMD19-T with <i>aCPSF2</i> donor and its open reading frame<br>(ORF)                                                                                                                           | This study           |
| pMD19-T-Donor-aCPSF2                                                | pMD19-T with <i>aCPSF2</i> donor                                                                                                                                                               | This study           |
| pMEV4                                                               | <i>E. coli/M. maripaludis</i> shuttle vector, only replicates in <i>M. maripaludis</i> S0001 , Amp <sup>R</sup> , Pur <sup>R</sup>                                                             | This study           |
| pMEV4-Cas9 (pMEV401)                                                | pMEV4 containing the Cas9 ORF, Amp <sup>R</sup> , Pur <sup>R</sup>                                                                                                                             | This study           |
| pMEV4-sgRNA-Cas9 (pMEV402)                                          | pMEV4 containing the Cas9 ORF and a guide sequence 5'-TGATTTATTGATACAACAG targeting to <i>Mmp1197</i> ,<br>Amp <sup>R</sup> , Pur <sup>R</sup>                                                 | This study           |



|                                                                            |                                                                                                                                                                                              |            |
|----------------------------------------------------------------------------|----------------------------------------------------------------------------------------------------------------------------------------------------------------------------------------------|------------|
| pMEV4-Cas9- $\Delta$ <i>Mmp1197</i><br>(pMEV403)                           | pMEV4 containing donor, Cas9 ORF and a guide sequence 5'-TGATTTATTTGATACAACAG targeting to <i>Mmp1197</i> ,<br>Amp <sup>R</sup> , Pur <sup>R</sup>                                           | This study |
| pMEV4-Cas9- $\Delta$<br><i>aCPSF1b/aCPSF2</i><br>(pMEV404)                 | pMEV4 containing donor, Cas9 ORF and guide sequence 5'-ATAATTATTGAATCTACTTA and 5'-TCCCTGTATTTGCAGTTGAT targeting to <i>aCPSF1b</i> and <i>aCPSF2</i> , Amp <sup>R</sup> , Pur <sup>R</sup>  | This study |
| pMEV4-Cas9- $\Delta$ <i>fla</i><br>(pMEV405)                               | pMEV4 containing donor, Cas9 ORF and a guide sequence 5'-CCGAAGAGGTAAAAATCTCA and 5'-GTAATGACTGGAAGCCTCCT targeting to <i>flaB1</i> and <i>flaJ</i> ,<br>Amp <sup>R</sup> , Pur <sup>R</sup> | This study |
| pMEV4-Cas9- $\Delta$<br><i>aCPSF1b/aCPSF2/fla</i><br>(pMEV406 and pMEV407) | pMEV4 containing donor, Cas9 ORF and the guide sequences that pMEV4-Cas9- $\Delta$ <i>aCPSF1b/aCPSF2</i> and pMEV4-Cas9- $\Delta$ <i>fla</i> contains, Amp <sup>R</sup> , Pur <sup>R</sup>   | This study |
| pMD19-T- <i>aCPSF1</i>                                                     | pMD19-T with S0001 <i>MMP0694-MMP0693</i> fragment                                                                                                                                           | This study |
| pMD19-T- <i>aCPSF1-H2F</i>                                                 | pMD19-T with S0001 <i>MMP0694-His6-3Flag-MMP0693</i> fragment                                                                                                                                | This study |
| pMEV4- <i>Cas9-sg2- aCPSF1-H2F</i> (pMEV409)                               | pMEV4- <i>Cas9</i> with sg2 targeting <i>aCPSF1</i> and donor ( <i>MMP0694-His6-3Flag-MMP0693</i> )                                                                                          | This study |
| pMD19-T- <i>RpoL</i>                                                       | pMD19-T with S0001 <i>MMP0261-MMP0260</i> fragment                                                                                                                                           | This study |
| pMD19-T- <i>RpoL-H2F</i>                                                   | pMD19-T with S0001 <i>MMP0261-His6-3Flag-MMP0260</i> fragment                                                                                                                                | This study |
| pMEV4- <i>Cas9-sg3- RpoL-H2F</i> (pMEV408)                                 | pMEV4- <i>Cas9</i> with sg3 targeting <i>RpoL</i> and donor ( <i>MMP0261-His6-3Flag-MMP0260</i> )                                                                                            | This study |
| pMEV4-Cas9-mu0290-sg<br>(pMEV410)                                          | pMEV4- <i>Cas9</i> with sg targeting T1149 and donor ( <i>MMP0290-MMP0291</i> with point mutagenesis of T1149 sequence)                                                                      | This study |
| pMEV4- <i>Cas9-sgP0386-P0386(-3) -mcherry</i><br>(pMEV411)                 | pMEV4- <i>Cas9</i> with sgP0386 targeting <i>P0386</i> and donor ( <i>P0386-mCherry</i> with -3 point mutagenesis of sgP0386 targeting sequence)                                             | This study |
| pMEV4- <i>Cas9- sgP0386-P0386(-2) -mcherry</i><br>(pMEV412)                | pMEV4- <i>Cas9</i> with sgP0386 targeting <i>P0386</i> and donor ( <i>P0386-mCherry</i> with -2 point mutagenesis of sgP0386 targeting sequence)                                             | This study |
| pMEV4- <i>Cas9- sgP0386-P0386(-2 and -3) -mcherry</i><br>(pMEV413)         | pMEV4- <i>Cas9</i> with sgP0386 targeting <i>P0386</i> and donor ( <i>P0386-mCherry</i> with -2 and -3 point mutagenesis of sgP0386 targeting sequence)                                      | This study |
| pMEV4- <i>Cas9- sgP0386-P0386(1) -mcherry</i><br>(pMEV414)                 | pMEV4- <i>Cas9</i> with sgP0386 targeting <i>P0386</i> and donor ( <i>P0386-mCherry</i> with 1 point mutagenesis of sgP0386 targeting sequence)                                              | This study |
| pMEV4- <i>Cas9- sgP0386-P0386(3) -mcherry</i><br>(pMEV415)                 | pMEV4- <i>Cas9</i> with sgP0386 targeting <i>P0386</i> and donor ( <i>P0386-mCherry</i> with 3 point mutagenesis of sgP0386 targeting sequence)                                              | This study |
| pMEV4- <i>Cas9-sg1- (-2)mcherry</i> (pMEV416)                              | pMEV4- <i>Cas9</i> with sg1 targeting <i>mCherry</i> and donor ( <i>P0386-mCherry</i> with -2 point mutagenesis of sg1 targeting sequence)                                                   | This study |
| pMEV4- <i>Cas9-sg2- (1m)mcherry</i> (pMEV417)                              | pMEV4- <i>Cas9</i> with sg2 targeting <i>mCherry</i> and donor ( <i>P0386-mCherry</i> with 1 point mutagenesis of sg2 targeting sequence)                                                    | This study |

**Table S2. Primers used in this study.**

| Primer                               | Sequence (5'-3')                                 | Purpose                                                              |
|--------------------------------------|--------------------------------------------------|----------------------------------------------------------------------|
| <i>Mmp1197</i> - genome-F            | GTGACTTTGGCAGTACGCTT                             | Construction of strain $\Delta$ <i>Mmp1197</i>                       |
| <i>Mmp1197</i> - genome-R            | CAGTCTGCCATATTTTAAAG                             | Construction of strain $\Delta$ <i>Mmp1197</i>                       |
| Del-1197-ORF-F                       | TCCTGGAAGTGATGCTGGAC                             | Construction of strain $\Delta$ <i>Mmp1197</i>                       |
| Del-1197-ORF-R                       | TCCTGTTCCAAGGATTCCAA                             | Construction of strain $\Delta$ <i>Mmp1197</i>                       |
| pMEV4-(1197)-F                       | GAGAATAGAAAGTACATTATATTGC                        | Construction of strain $\Delta$ <i>Mmp1197</i>                       |
| pMEV4-(1197)-R                       | ATAACTTAAAAAACCTTGGATTTTTG                       | Construction of strain $\Delta$ <i>Mmp1197</i>                       |
| <i>Mmp1197</i> -(pMEV4)-F            | TCCAAGGTTTTTAAAGTTATGTGACTTTGGCAGTACGC           | Construction of strain $\Delta$ <i>Mmp1197</i>                       |
| <i>Mmp1197</i> -(pMEV4)-R            | ATAATGTACTTTCTATTCTCCAGTCTGCCATATTTTAAAGAGG      | Construction of strain $\Delta$ <i>Mmp1197</i>                       |
| $\Delta$ - <i>Mmp1197</i> out-F (F1) | GCACAGCATGCAACAGCAAC                             | Verification of knockout- <i>Mmp1197</i>                             |
| $\Delta$ - <i>Mmp1197</i> out-R (R1) | CTTGAGTCTCAGGCTCTTCG                             | Verification of knockout- <i>Mmp1197</i>                             |
| $\Delta$ - <i>MMP1197</i> in-F (F1') | AGCATGGGAAGCTCTTGCAA                             | Verification of knockout- <i>Mmp1197</i>                             |
| $\Delta$ - <i>MMP1197</i> in-R(R1')  | CCAGCATCACTTCCAGGAAG                             | Verification of knockout- <i>Mmp1197</i>                             |
| <i>aCPSF2</i> up-dn-(T)F:            | CTTTCAAACATCGTAATCTATTTTTGG                      | Deletion of <i>Mmp</i> ( <i>aCPSF2</i> )                             |
| <i>aCPSF2</i> up-dn-(T)R:            | AAAATAAATCGGAGAGTCCTTGAAA                        | Deletion of <i>Mmp</i> ( <i>aCPSF2</i> )                             |
| <i>aCPSF2</i> del-(T)-F:             | CGTCGCACGCAGAAGTTGTAATAATATTTAAA<br>GATTG        | Deletion of <i>Mmp</i> ( <i>aCPSF2</i> )                             |
| <i>aCPSF2</i> del-(T)-R:             | TACAACCTTCTGCGTGCGACGCAAAGACAC                   | Deletion of <i>Mmp</i> ( <i>aCPSF2</i> )                             |
| <i>aCPSF1b</i> up-dn-(T)F:           | CCAGATTTTCTTATCCATGCGAC                          | Deletion of <i>Mmp</i> ( <i>aCPSF1b</i> )                            |
| <i>aCPSF1b</i> up-dn-(T)R:           | CTGCTGTTTTTCCTTGACG                              | Deletion of <i>Mmp</i> ( <i>aCPSF1b</i> )                            |
| <i>aCPSF1b</i> del-(T)-F:            | AGATAAACACGAGCGATTCCGGTAAATG                     | Deletion of <i>Mmp</i> ( <i>aCPSF1b</i> )                            |
| <i>aCPSF1b</i> del-(T)-R:            | GGAATCGCTCGTGTTTATCTCTACGCAAG                    | Deletion of <i>Mmp</i> ( <i>aCPSF1b</i> )                            |
| Sg <i>aCPSF1b/aCPSF2</i> -(pMEV4)-F: | TAAAAATATGGCAGACTGGATCAAATGGTAAG<br>GTATATATAGTG | Construction of strain $\Delta$ <i>Mmp</i> ( <i>aCPSF1b/aCPSF2</i> ) |
| flaJ dn-(pMEV4)-                     | ATATACCTTACCATTTGATCGCGGGTTTGAAA                 | Construction of strain $\Delta$ <i>Mmp</i> <i>fla</i>                |

|                                        |                                                                                                                                                          |                                                               |
|----------------------------------------|----------------------------------------------------------------------------------------------------------------------------------------------------------|---------------------------------------------------------------|
| R:                                     | TGCTTTAAATG                                                                                                                                              |                                                               |
| <i>aCPSF1b</i> in-F (F2`)              | TGCGGTGCAATACCTTACTT                                                                                                                                     | Verification of knockout- <i>aCPSF1b</i>                      |
| <i>aCPSF1b</i> in-R(R2`)               | CCTTCAGCTTGATATCCGGT                                                                                                                                     | Verification of knockout- <i>aCPSF1b</i>                      |
| <i>aCPSF1b</i> out-F(F2)               | TGGAAGACCCACTCAAAGAG                                                                                                                                     | Verification of knockout- <i>aCPSF1b</i>                      |
| <i>aCPSF1b</i> out-R (R2)              | AGGGTGAATTCCTTCTCCAC                                                                                                                                     | Verification of knockout- <i>aCPSF1b</i>                      |
| <i>aCPSF2</i> in-F(F3`)                | GAAGGGCAGGATATCCCCTA                                                                                                                                     | Verification of knockout- <i>aCPSF2</i>                       |
| <i>aCPSF2</i> in-R(R3`)                | AATTCGTCCATTTCCGCCATG                                                                                                                                    | Verification of knockout- <i>aCPSF2</i>                       |
| <i>aCPSF2</i> out-F(F3)                | GTGAACTACTGCTGGAAGGT                                                                                                                                     | Verification of knockout- <i>aCPSF2</i>                       |
| <i>aCPSF2</i> out-R(R3)                | GACGGTAGCGTTGCAGTTCA                                                                                                                                     | Verification of knockout- <i>aCPSF2</i>                       |
| <i>flaB1</i> -in F(F4`)                | CTGGAAGCGTTGGAACATCA                                                                                                                                     | Verification of knockout- <i>fla</i>                          |
| <i>flaB1</i> -in R(R4`)                | ACCTGGAGCACCAAATTCTG                                                                                                                                     | Verification of knockout- <i>fla</i>                          |
| <i>flaJ</i> -in-F (F4``)               | CAGGCTACACTCGGTTGGTC                                                                                                                                     | Verification of knockout- <i>fla</i>                          |
| <i>flaJ</i> -in-R (R4``)               | CACCGTAGTCTTCCATCACG                                                                                                                                     | Verification of knockout- <i>fla</i>                          |
| <i>Fla</i> -out-F (F4)                 | CAACGAGTGTATCAGTTGCA                                                                                                                                     | Verification of knockout- <i>fla</i>                          |
| <i>Fla</i> -out-R (R4)                 | AATTCTCGCATCAATAGTCG                                                                                                                                     | Verification of knockout- <i>fla</i>                          |
| P0386-newRBS-Cas9-F                    | TTTTAAACGATTTTTCCGAAAGATTTATATATTTA<br>GTTTTCCAAAATTAACCTGGATAACTAATACTAG<br>AGAGGAGGTGAAATAATGGATAAAAAATATAGT<br>ATTGGTTTAGATATAGG                      | Construction of strain $\Delta Mmp$ <i>aCPSF1b/aCPSF2/fla</i> |
| P0386-newRBS-Cas9-R                    | ATTTTTATCCATTATTTACCTCCTCTCTAGTATT<br>AGTTATCCAGTTTTAATTTGGAAAATAAATAT<br>ATAAATCTTTCGGAAAAATCGTTTAAAAATAAA<br>AAAAAGTAGTATATTTATATATTTTCGCACCGACTC<br>G | Construction of strain $\Delta Mmp$ <i>aCPSF1b/aCPSF2/fla</i> |
| P0386-oldRBS-F                         | TATTTTTAAACGATTTTTCCGAAAGATTTATATAT<br>TTAGTTTTCCAAAATTAACCTGACTAGAGTGC<br>AGGTAGCGCTATGG                                                                | Construction of strain $\Delta Mmp$ <i>aCPSF1b/aCPSF2/fla</i> |
| P0386-oldRBS-R                         | CCTGCACTCTAGTCAGTTTTAATTTGGAAAATAA<br>AAATATATAAATCTTTCGGAAAAATCGTTTAAAA<br>ATAAAAAAAGTAGTATATTTATATATTTTC                                               | Construction of strain $\Delta Mmp$ <i>aCPSF1b/aCPSF2/fla</i> |
| H2F-F                                  | GAGATCTCACCACCACCACCACGAAAATGA<br>TTATAAAGATGACGATGACAAAGATTATAAAGAT<br>GACGATGACAAAGATTATAAAGATGACGATGAC<br>AAATAAGTATTCTTTTTTTATTTTTAATTC              | Construction of in situ tagging of <i>aCPSF1</i>              |
| H2F-R                                  | AAAGAATACTTATTTGTCATCGTCATCTTTATAAT<br>CTTTGTCATCGTCATCTTTATAATCTTTGTCATCG<br>TCATCTTATAATCATTTTCGTGGTGGTGGTGGT<br>GGTGAGATCTCAATCTTATTGAATCG            | Construction of in situ tagging of <i>aCPSF1</i>              |
| <i>Sg2-anti0694tem-(Cas9-pMEV4)</i> -F | ATTTACTTGCTTATTGAATCGAGATTCATGTTTT<br>AGAGCTAGAAATAGCAAG                                                                                                 | Construction of in situ tagging of <i>aCPSF1</i>              |
| <i>Sg2-anti0694tem-(Cas9-pMEV4)</i> -R | GCTCTAAAACATGAATCTCGATTCAATAAGCAA<br>GTATAATTACTAATCAGCAATATAATG                                                                                         | Construction of in situ tagging of <i>aCPSF1</i>              |
| <i>C1-HF</i> -F                        | TCCAAGGTTTTTAAAGTTATCCTCGCAGATGATG<br>AGAAAAAC                                                                                                           | Construction of in situ tagging of <i>aCPSF1</i>              |
| <i>C1-HF</i> -R                        | ATAATGTACTTTCTATTCTCCCTGCTTCTTCTAAT                                                                                                                      | Construction of in situ tagging of <i>aCPSF1</i>              |

|                                         |                                                                                                                                                |                                                           |
|-----------------------------------------|------------------------------------------------------------------------------------------------------------------------------------------------|-----------------------------------------------------------|
|                                         | TGGG                                                                                                                                           |                                                           |
| <i>pMEV-sg-Cas9-F</i>                   | GAGAATAGAAAAGTACATTATATTGC                                                                                                                     | Construction of in situ tagging of <i>aCPSF1</i>          |
| <i>pMEV-sg-Cas9-R</i>                   | ATAACTTAAAAAACCTTGGATTTTTG                                                                                                                     | Construction of in situ tagging of <i>aCPSF1</i>          |
| <i>mutant-0694tem - F</i>               | CGAAAGCTCCAATGAATTTAGATTCAATAAGATT<br>GAGATCTCACCAC                                                                                            | Construction of in situ tagging of <i>aCPSF1</i>          |
| <i>mutant-0694tem - R</i>               | TGAGATCTCAATCTTATTGAATCTAAATTCATTG<br>GAGCTTTCGTTTC                                                                                            | Construction of in situ tagging of <i>aCPSF1</i>          |
| <i>yz-C1-F (F6)</i>                     | GGACACATTTTAGGTTTCAGC                                                                                                                          | Validation of in situ tagging of <i>aCPSF1</i>            |
| <i>yz-0693-R (R6)</i>                   | CCTTCAAGAACTAGTTCTCCCG                                                                                                                         | Validation of in situ tagging of <i>aCPSF1</i>            |
| <i>RpoLC- (S0001) -F</i>                | ATTCTTGACATTTATTCTGAAC                                                                                                                         | Construction of in situ tagging of <i>RpoL</i>            |
| <i>RpoLC- (S0001) -R</i>                | CGATAAAGAAGCCGTGTG                                                                                                                             | Construction of in situ tagging of <i>RpoL</i>            |
| <i>H2F-RpoLC-F</i>                      | TTTACACCACCACCACCACCACGAAAATGATTA<br>TAAAGATGACGATGACAAAGATTATAAAGATGA<br>CGATGACAAAGATTATAAAGATGACGATGACAA<br>ATAATTGATATTTTATATCGGCATAATTTAT | Construction of in situ tagging of <i>RpoL</i>            |
| <i>H2F-RpoLC-R</i>                      | TATCAATTATTTGTCATCGTCATCTTTATAATCTTT<br>GTCATCGTCATCTTTATAATCTTTGTCATCGTCAT<br>CTTTATAATCATTTTCGTGGTGGTGGTGGTGGTGGT<br>TAAATCTTCAAGGGTTTTGTTAC | Construction of in situ tagging of <i>RpoL</i>            |
| <i>SgRpoLCtem-3- (Cas9-pMEV4)-F</i>     | ATTATACTTGATCAATTATAAATCTTCAAGTTTT<br>AGAGCTAGAAATAGCAAG                                                                                       | Construction of in situ tagging of <i>RpoL</i>            |
| <i>SgRpoLCtem-3- (Cas9-pMEV4)-R</i>     | GCTCTAAAACCTGAAGATTATAATTGATACAAG<br>TATAATTACTAATCAGCAATATAAT                                                                                 | Construction of in situ tagging of <i>RpoL</i>            |
| <i>RpoLC- (pMEV4-Cas9)-F</i>            | TCCAAGGTTTTTTAAGTTATATTCTTGACATTTAT<br>TCTGAACCTAAC                                                                                            | Construction of in situ tagging of <i>RpoL</i>            |
| <i>RpoLC- (pMEV4-Cas9)-R</i>            | ATAATGTACTTTCTATTCTCCGATAAAGAAGCCG<br>TGTGCG                                                                                                   | Construction of in situ tagging of <i>RpoL</i>            |
| <i>yz-RpoL-F (F5)</i>                   | GGCGATGAAAAGTACAACTCGTAGAAGACC                                                                                                                 | Validation of in situ tagging of <i>RpoL</i>              |
| <i>yz-2060-R (R5)</i>                   | GTTTGCATTTGCAGGCACTGGTTGTGGC                                                                                                                   | Validation of in situ tagging of <i>RpoL</i>              |
| <i>Sg0386tem-(Cas9-pMEV4)-F</i>         | ATTATACTTGAACATAAATATATAAATCTTTGTTTT<br>AGAGCTAGAAATAGCAAG                                                                                     | Construction of in situ point mutagenesis of <i>P0386</i> |
| <i>Sg0386tem-(Cas9-pMEV4)-R</i>         | GCTCTAAAACAAAGATTATATATTAGTTCAAG<br>TATAATTACTAATCAGCAATATAAT                                                                                  | Construction of in situ point mutagenesis of <i>P0386</i> |
| <i>Sat-P0386-mCherry-(Cas9-pMEV4)-F</i> | TCCAAGGTTTTTTAAGTTATCTTTAGTTAATGGT<br>GGATCAACTGG                                                                                              | Construction of in situ point mutagenesis of <i>P0386</i> |
| <i>Sat-P0386-mCherry-(Cas9-pMEV4)-R</i> | ATAATGTACTTTCTATTCTC TGATGCTTCCCAAC<br>CCATTG                                                                                                  | Construction of in situ point mutagenesis of <i>P0386</i> |
| <i>P0386-negative3-F</i>                | TTTATTAACCTATTTTTTTTTTCGAAAGATTTATAT<br>ATTTAG                                                                                                 | Construction of in situ point mutagenesis of <i>P0386</i> |
| <i>P0386-negative3-R</i>                | CTAAATATATAAATCTTTCGAAAAAAAAAATAGG<br>TTAATAAA                                                                                                 | Construction of in situ point mutagenesis of <i>P0386</i> |
| <i>P0386-negative2-F</i>                | TTTATTAACCTATTTTTTTTT CTGAAAGATTTATA<br>TATTTAG                                                                                                | Construction of in situ point mutagenesis of <i>P0386</i> |
| <i>P0386-negative2-R</i>                | CTAAATATATAAATCTTTCAGAAAAAAAAAATAGG<br>TTAATAAA                                                                                                | Construction of in situ point mutagenesis of <i>P0386</i> |
| <i>P0386-negative 2、3-F</i>             | TTTATTAACCTATTTTTTTTT TTGAAAGATTTATA<br>TATTTAG                                                                                                | Construction of in situ point mutagenesis of <i>P0386</i> |
| <i>P0386-negative 2、3-R</i>             | CTAAATATATAAATCTTTCAAAAAAAAAATAGG<br>TTAATAAA                                                                                                  | Construction of in situ point mutagenesis of <i>P0386</i> |
| <i>P0386-1-F</i>                        | TAACCTATTTTTTTTTCCGGAAGATTTATATATTT<br>AGTTTTCC                                                                                                | Construction of in situ point mutagenesis of <i>P0386</i> |
| <i>P0386-1-R</i>                        | GGAAAACATAAATATATAAATCTTCCGGAAAAAA<br>AAATAGGTTA                                                                                               | Construction of in situ point mutagenesis of <i>P0386</i> |
| <i>P0386-3-F</i>                        | CCTATTTTTTTTTCCGGAAGATTTATATATTTAGT<br>TTTCC                                                                                                   | Construction of in situ point mutagenesis of <i>P0386</i> |
| <i>P0386-3-R</i>                        | GGAAAACATAAATATATAAATCCTTCCGGAAAAAA                                                                                                            | Construction of in situ point mutagenesis of <i>P0386</i> |

|                                     |                                                                                       |                                                             |
|-------------------------------------|---------------------------------------------------------------------------------------|-------------------------------------------------------------|
|                                     | AAATAGG                                                                               | 386                                                         |
| <i>SAT-F</i>                        | GTGTCCTGCTCCTCTTTCTCTAGC                                                              | Validation of in situ point mutagenesis of <i>P0386</i>     |
| <i>MCH-R</i>                        | AACGTTGTATGCACCTGGTAACTGAACTG                                                         | Validation of in situ point mutagenesis of <i>P0386</i>     |
| <i>Sg5-mCherry -F</i>               | ATTATACTTGGTGGTCCATTACCATTTCGAGTTTT<br>AGAGCTAGAAATAGCAAG                             | Construction of in situ point mutagenesis of <i>mCherry</i> |
| <i>Sg5-mCherry -R</i>               | GCTCTAAAACCTGCGAATGGTAATGGACCAC CAA<br>GTATAATTACTAATCAGCAATATAAT                     | Construction of in situ point mutagenesis of <i>mCherry</i> |
| <i>temsg8-mCherry -F</i>            | ATTATACTTG TTTGAACCGTACATAAACTGGTTT<br>TAGAGCTAGAAATAGCAAG                            | Construction of in situ point mutagenesis of <i>mCherry</i> |
| <i>temsg8-mCherry -R</i>            | GCTCTAAAACCTGTTTATGTACGGTTCAAA CAA<br>GTATAATTACTAATCAGCAATATAAT                      | Construction of in situ point mutagenesis of <i>mCherry</i> |
| <i>mCherry sg1-pam (-2) TAG -F2</i> | CCATTTCGCATAGGATATATTATCACCACAGTTTAT<br>GTACGGTTC                                     | Construction of in situ point mutagenesis of <i>mCherry</i> |
| <i>mCherry sg1-pam (-2) TAG -R2</i> | CTGTGGTGATAATATATCCTATGCGAATGGTAATG<br>GACCACC                                        | Construction of in situ point mutagenesis of <i>mCherry</i> |
| <i>mCherry temsg2-ITAG -F2</i>      | GCATGGGATATATTATCACCATAGTTTATGTACGG<br>TTCAAAAAGCATAACG                               | Construction of in situ point mutagenesis of <i>mCherry</i> |
| <i>mCherry temsg2-ITAG -R2</i>      | GCTTTTGAACCGTACATAAACTATGGTGATAATA<br>TATCCCATGCG                                     | Construction of in situ point mutagenesis of <i>mCherry</i> |
| <i>Mmp0290- genome-F</i>            | TTGGAATCCTTGGAACAGGACGAAGATTTAAAG<br>GCTGTC                                           | Construction of strain <i>Mmp-T0290-mutant</i>              |
| <i>Mmp0291- genome-R</i>            | ATAATGTACTTTCTATTCTCATGGAAAATCACTTA<br>ATCTTGAG                                       | Construction of strain <i>Mmp-T0290-mutant</i>              |
| <i>mutant-T1149 -F</i>              | TTTTTTAATTAAGAATACACTACATACACCAA<br>TAAGAAATACTCATCTAAGGCCGGTGAGAGAAT<br>G            | Construction of strain <i>Mmp-T0290-mutant</i>              |
| <i>mutant-T1149 -R</i>              | CGGCCTTAGATGAGTATTTCTTATTGGTGTATGTA<br>GTGTATCTTTAATTAATAAAAAATTAAAAATTAGT<br>TTCCGAG | Construction of strain <i>Mmp-T0290-mutant</i>              |
| <i>Sg-T1149-F</i>                   | ATTATACTTGGTGAGAGAATGGATATCGAAGTTT<br>TAGAGCTAGAAATAGCAAG                             | Construction of strain <i>Mmp-T0290-mutant</i>              |
| <i>Sg-T1149-R</i>                   | GCTCTAAAACCTTCGATATCCATTCTCTACCAAG<br>TATAATTACTAATCAGCAATATAATG                      | Construction of strain <i>Mmp-T0290-mutant</i>              |

65

66

**Table S3. Sequences of promoters and terminators used to express sgRNAs in this study.**

| Plasmid            | sgRNA                            | Promoters(5`-3`)                                         | Terminators(5`-3`)                             |
|--------------------|----------------------------------|----------------------------------------------------------|------------------------------------------------|
| pMEV402<br>pMEV403 | <i>ssuC(1197)</i>                | Pmcr:<br>GAATAGAAAGTACATTATATTGCTGATTAGTAATTATACTTG      | T1149:<br>TTATTTTTTACTTTTTTAAATTTTAAA          |
| pMEV404            | <i>aCPSF1b(1381)</i>             | P0383:<br>TCAAATGGTAAGGTATATATAGTGATGGCGACAAGGCTATTCTTG  | T1249:<br>AAAACCTAATCTAATACTTTTTTAAATTTTGAAT   |
|                    | <i>aCPSF2(0431)</i>              | P1555:<br>TTTAATGAAAACCTTGAATATATATTCTTTCAGTAATGTTATGATG | T1274:<br>TTAAAAGAATAATTCTTTTTTTTATTTTTTAACTG  |
| pMEV405            | <i>flaB1(1666)</i>               | P0383<br>TCAAATGGTAAGGTATATATAGTGATGGCGACAAGGCTATTCTTG   | T1249:<br>AAAACCTAATCTAATACTTTTTTAAATTTTGAAT   |
|                    | <i>flaJ(1676)</i>                | P1555:<br>TTTAATGAAAACCTTGAATATATATTCTTTCAGTAATGTTATGATG | T1274:<br>TTAAAAGAATAATTCTTTTTTTTATTTTTTAACTG  |
| pMEV406<br>pMEV407 | <i>flaB1(1666)</i>               | P0076:<br>ATGAACTCAGATACTTATATATACTAGCAAATGAAGTGTAATATA  | T1149:<br>TTATTTTTTACTTTTTTAAATTTTAAA          |
|                    | <i>flaJ(1676)</i>                | P0386:<br>TTTTTCCGAAAGATTTATATATTTAGTTTCCAAAATTAAAACCTG  | T1274:<br>TTAAAAGAATAATTCTTTTTTTTATTTTTTAACTG  |
|                    | <i>aCPSF1b(1381)</i>             | P0383:<br>TCAAATGGTAAGGTATATATAGTGATGGCGACAAGGCTATTCTTG  | T1249:<br>AAAACCTAATCTAATACTTTTTTAAATTTTGAAT   |
|                    | <i>aCPSF2(0431)</i>              | P0260:<br>TTTAACTCAGTAACTTATATATAATAGTAAGTGATAGTATGTCTG  | T0204:<br>TATATAAATACTACTTTTTTTTTATTTTTTAAACGA |
| pMEV408            | <i>RpoL(0261)</i>                | Pmcr:<br>GAATAGAAAGTACATTATATTGCTGATTAGTAATTATACTTG      | T1149:<br>TTATTTTTTACTTTTTTAAATTTTAAA          |
| pMEV409            | <i>aCPSF1(0694)</i>              | Pmcr:<br>GAATAGAAAGTACATTATATTGCTGATTAGTAATTATACTTG      | T1149:<br>TTATTTTTTACTTTTTTAAATTTTAAA          |
| pMEV410            | <i>MMP0290 terminator(T1149)</i> | Pmcr:<br>GAATAGAAAGTACATTATATTGCTGATTAGTAATTATACTTG      | T1149:<br>TTATTTTTTACTTTTTTAAATTTTAAA          |

---

pMEV411~  
pMEV417

*mCherry*

Pmc:

GAATAGAAAGTACATTATATTGCTGATTAGTAATTATACTTG

T1149:

TTATTTTTTACTTTTTTAAATTTAAA

---

69 **Table S4. Probes used in northern blot assay.**

|                       |                                                               |
|-----------------------|---------------------------------------------------------------|
| MMP0290-<br>mid-probe | GCTTTTCCAGTAATCGAATAAGTTTTATTTCCTCAAGCATGTCCATTACCTGAACTTTTGG |
| MMP0291-5'-<br>probe  | CCACTGCTTCGACAAATCTTCTTGCCCATCCTTCATCAGTGTCTTTAACTTCAATCACT   |

70

71

72 **Table S5. Summary of the genome editing efficiency and precision achieved in this study.**

| Target                                            | Plasmid             | Selected transformants | Positive transformants | Editing efficiency* (Precision) |
|---------------------------------------------------|---------------------|------------------------|------------------------|---------------------------------|
| <i>suuC</i>                                       | pMEV403             | 18                     | 18                     | 100%                            |
| <i>aCPSF1b</i> ,<br><i>aCPSF2</i>                 | pMEV404             | 16                     | 12                     | 75%                             |
| <i>fla</i>                                        | pMEV405             | 10                     | 10                     | 100%                            |
| <i>aCPSF1b</i> ,<br><i>aCPSF2</i> , <i>fla</i>    | pMEV407             | 9                      | 9                      | 100%                            |
| <i>RpoL</i>                                       | pMEV408             | 5                      | 5                      | 100%                            |
| <i>aCPSF1</i>                                     | pMEV409             |                        |                        | 100%                            |
| <i>T1149</i>                                      | pMEV410             | 5                      | 5                      | 100%                            |
| -3 point<br>mutagenesis of<br><i>P0386</i>        | pMEV411             | 5                      | 4                      | 80%                             |
| -2 point<br>mutagenesis of<br><i>P0386</i>        | pMEV412             | 5                      | 5                      | 100%                            |
| -3 and -2 point<br>mutagenesis of<br><i>P0386</i> | pMEV413             | 5                      | 5                      | 100%                            |
| 1 point<br>mutagenesis of<br><i>P0386</i>         | pMEV414             | 5                      | 5                      | 100%                            |
| 3 point<br>mutagenesis of<br><i>P0386</i>         | pMEV415             | 5                      | 3                      | 60%                             |
| mCherry                                           | pMEV416~<br>pMEV417 | 5                      | 5                      | 100%                            |

73 \* The editing efficiency was calculated as the positive transformant numbers divided by the selected transformant  
74 numbers, and the editing precision was determined by the accuracy of the positive transformants by PCR product  
75 sequencing.



76 **Reference**

- 77 1. Lyu Z, Shao N, Chou CW, Shi H, Patel R, Duin EC, Whitman WB. 2020.  
78 Posttranslational methylation of arginine in methyl coenzyme M reductase has  
79 a profound impact on both Methanogenesis and growth of *Methanococcus*  
80 *maripaludis*. J Bacteriol 202: e00654-19.
